# Supplementary material for: Quantitative evaluation and the toxicity mechanism of synergism within three organophosphorus pesticide mixtures to Chlorella pyrenoidosa
Source: Royal Society of Chemistry journal article supplement (doi:10.1039/d0em00262c), 2020-01-01
Supplement: d0em00262c1.pdf [file d0em00262c1.pdf]

## Appendix A: Supplementary Information

### **Quantitative evaluation and toxicity mechanism of synergism within three organophosphorus pesticide mixtures to *Chlorella pyrenoidosa***

Meng-ting Tao, Zhi-qiang Bian, Jin Zhang\*, Tao Wang, Hui-yan Shen

Key Laboratory of Water Pollution Control and Wastewater Resource of Anhui  
Province, College of Environment and Energy Engineering, Anhui Jianzhu University,  
Hefei 230601, PR China

Table S1 The fitted functions, parameters ( $\alpha$ ,  $\beta$ ), some statistics and the negative logarithm of the half effect concentration (pEC<sub>50</sub>) of three pesticides

| Pesticides | Time (h) | Fitted function | $\alpha$ | $\beta$ | $R$    | $RMSE$ | pEC <sub>50</sub> |
|------------|----------|-----------------|----------|---------|--------|--------|-------------------|
| ACE        | 24       | L               | 0.670    | 2.310   | 0.7463 | 0.014  | 0.290             |
|            | 48       | L               | 0.110    | 1.300   | 0.8385 | 0.026  | 0.084             |
|            | 72       | L               | 0.110    | 0.970   | 0.8803 | 0.040  | 0.113             |
|            | 96       | L               | 0.120    | 0.530   | 0.8826 | 0.036  | 0.226             |
| TRI        | 24       | L               | 0.010    | 1.870   | 0.8325 | 0.132  | 0.005             |
|            | 48       | L               | 0.010    | 0.790   | 0.8666 | 0.027  | 0.012             |
|            | 72       | L               | 0.140    | 0.560   | 0.8871 | 0.034  | 0.250             |
|            | 96       | L               | 0.810    | 0.500   | 0.9214 | 0.036  | 1.620             |
| GLY        | 24       | L               | 0.840    | 1.010   | 0.9659 | 0.020  | 0.831             |
|            | 48       | L               | 2.290    | 1.210   | 0.9402 | 0.056  | 1.892             |
|            | 72       | L               | 3.830    | 1.620   | 0.9418 | 0.087  | 2.364             |
|            | 96       | L               | 4.620    | 1.780   | 0.9397 | 0.102  | 2.595             |

Table S2 The fitted functions, parameters ( $\alpha$ ,  $\beta$ ), some statistics and the negative logarithm of the half effect concentration (pEC<sub>50</sub>) of ternary mixture systems

| Rays | Time (h) | Fitted function | $\alpha$ | $\beta$ | $R$    | $RESE$ | pEC <sub>50</sub> |
|------|----------|-----------------|----------|---------|--------|--------|-------------------|
| R1   | 24       | L               | 0.730    | 0.730   | 0.9418 | 0.019  | 0.013             |
|      | 48       | L               | 0.730    | 0.6     | 0.9701 | 0.022  | 1.216             |
|      | 72       | L               | 1.350    | 0.630   | 0.9597 | 0.033  | 2.142             |
|      | 96       | L               | 1.830    | 0.690   | 0.9513 | 0.040  | 2.652             |
| R2   | 24       | L               | 0.440    | 0.680   | 0.9110 | 0.032  | 0.647             |
|      | 48       | L               | 0.750    | 0.630   | 0.9597 | 0.026  | 1.190             |
|      | 72       | L               | 2.540    | 0.950   | 0.9701 | 0.041  | 2.673             |
|      | 96       | L               | 3.290    | 1.100   | 0.9633 | 0.053  | 2.991             |
| R3   | 24       | L               | 0.190    | 0.790   | 0.9492 | 0.020  | 0.240             |
|      | 48       | L               | 0.750    | 0.630   | 0.9597 | 0.026  | 1.190             |
|      | 72       | L               | 1.410    | 0.690   | 0.9767 | 0.025  | 2.043             |
|      | 96       | L               | 1.860    | 0.720   | 0.9638 | 0.036  | 2.583             |
| R4   | 24       | L               | 0.510    | 0.760   | 0.9695 | 0.017  | 0.671             |
|      | 48       | L               | 1.440    | 0.780   | 0.9844 | 0.020  | 1.846             |
|      | 72       | L               | 2.330    | 0.930   | 0.9859 | 0.027  | 2.505             |
|      | 96       | L               | 3.060    | 1.050   | 0.9829 | 0.034  | 2.914             |
| R5   | 24       | L               | 0.090    | 0.720   | 0.9772 | 0.013  | 0.125             |
|      | 48       | L               | 0.640    | 0.620   | 0.9612 | 0.024  | 1.032             |
|      | 72       | L               | 1.150    | 0.630   | 0.9492 | 0.035  | 1.825             |
|      | 96       | L               | 1.640    | 0.660   | 0.9545 | 0.037  | 2.484             |

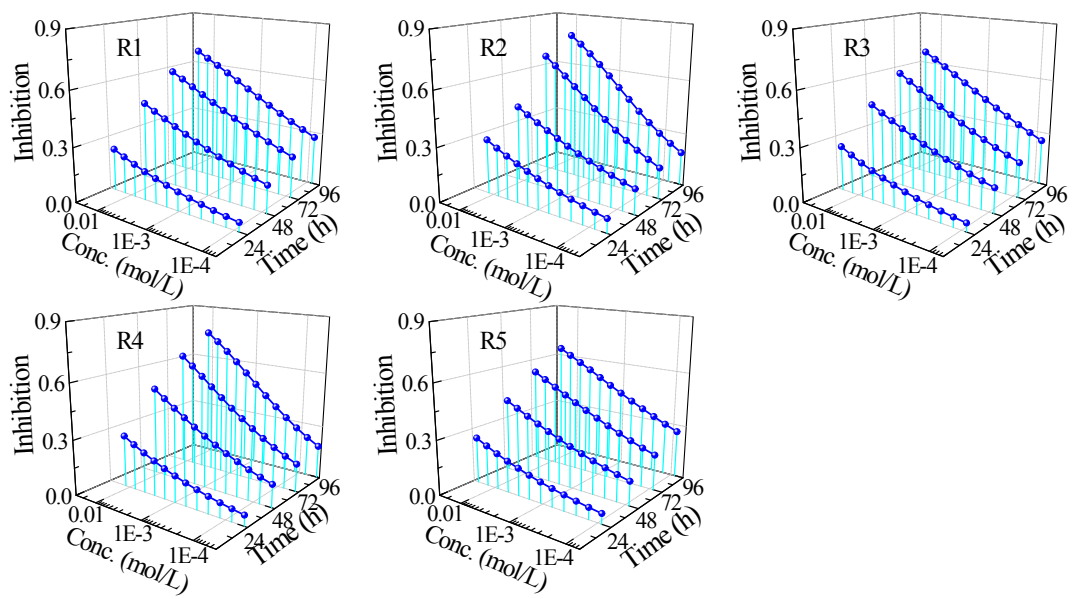

Fig. S1 CRCs of ACE-TRI-GLY mixture rays in different time
